# Supplementary material for: GDF11 expressed in the adult brain negatively regulates hippocampal neurogenesis
Source: PubMed Central journal article supplement (PMC8422669; doi:10.1186/s13041-021-00845-z), 2021-09-06

A)

Neuroblast

*Dcx*

*Gdf11*

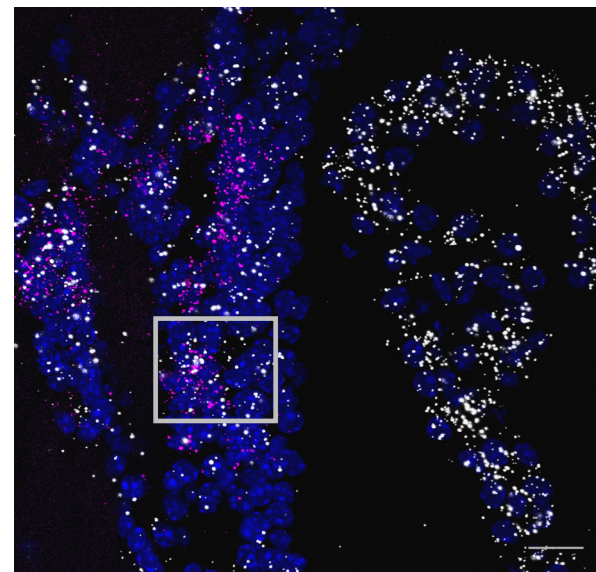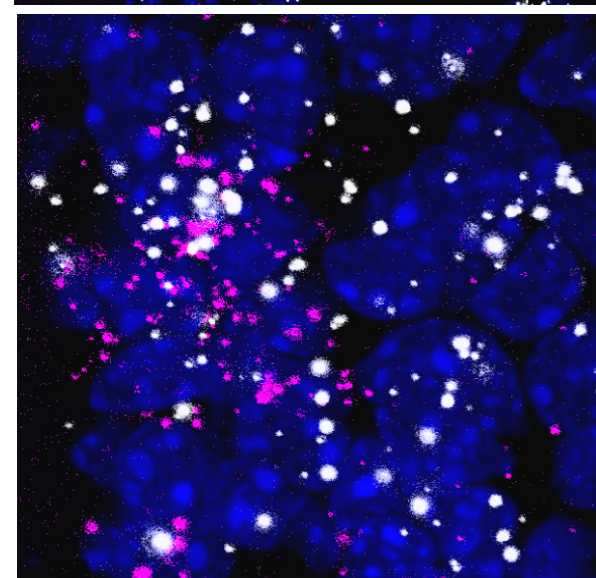

Endothelial

*Pecam1*

*Gdf11*

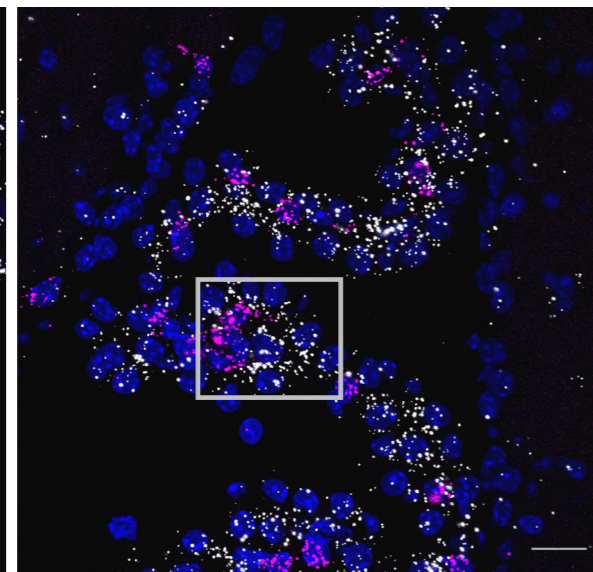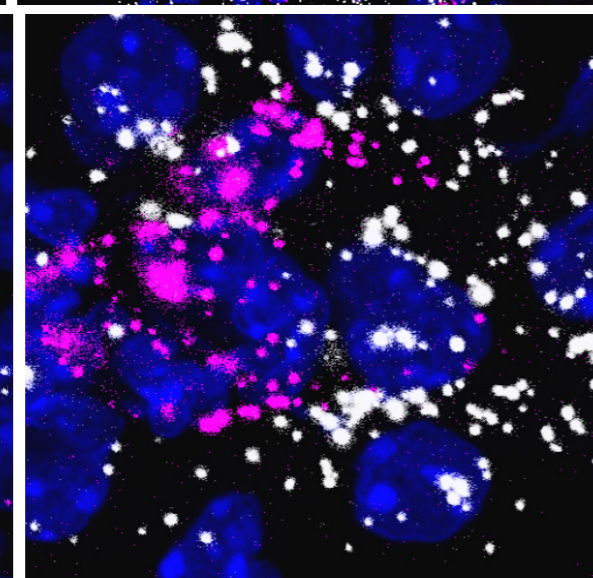

Choroid Plexus  
Epithelial

*Ttr*

*Gdf11*

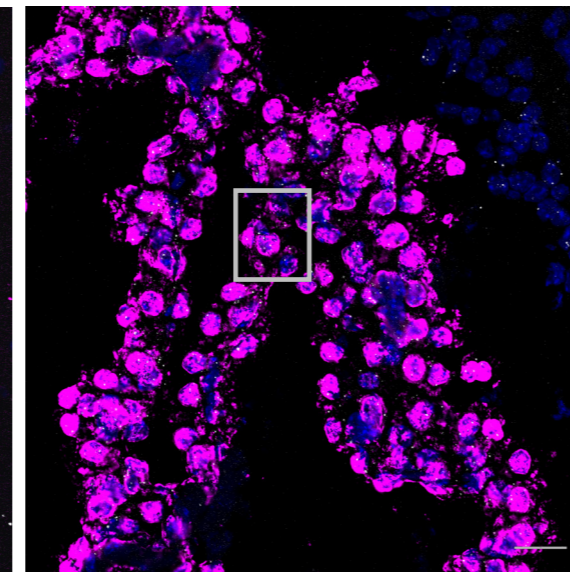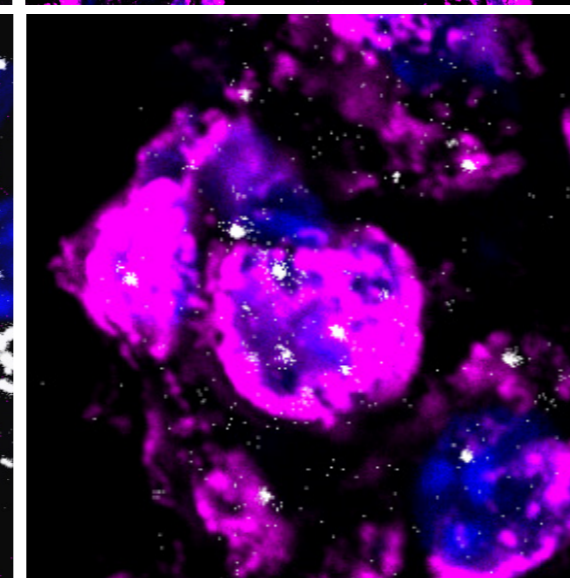

B)

Oligodendrocyte  
& OPCs

*Pdgfra*, *Olig1*

*Gdf11*

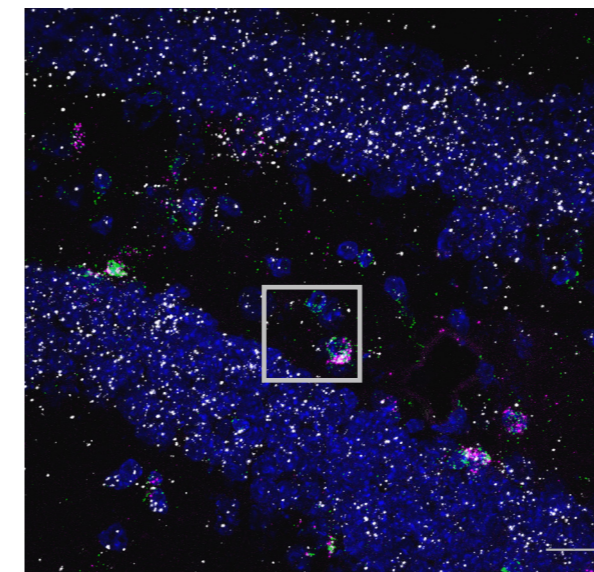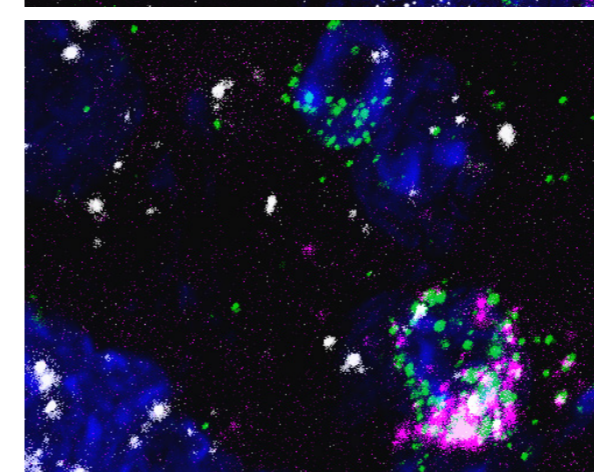

Endothelial

*Pecam1*

*Gdf11*

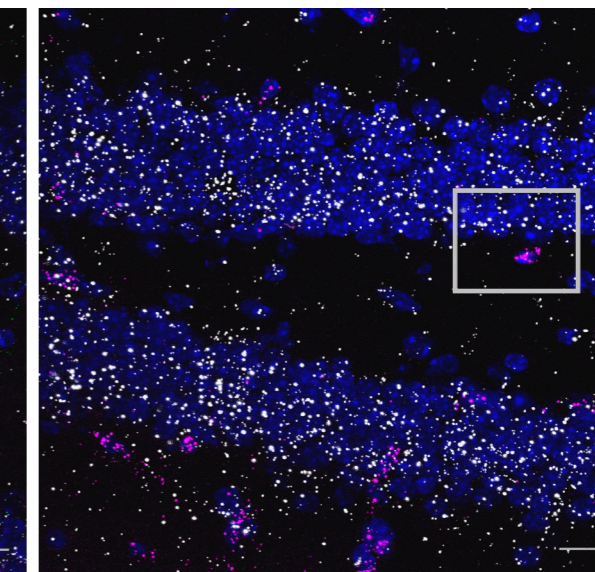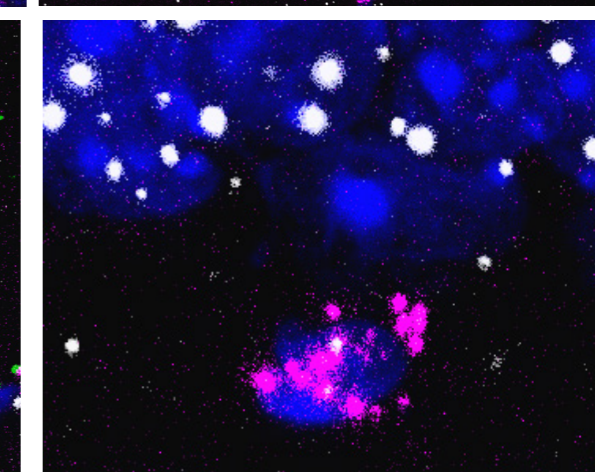

Microglia

*Itgam*

*Gdf11*

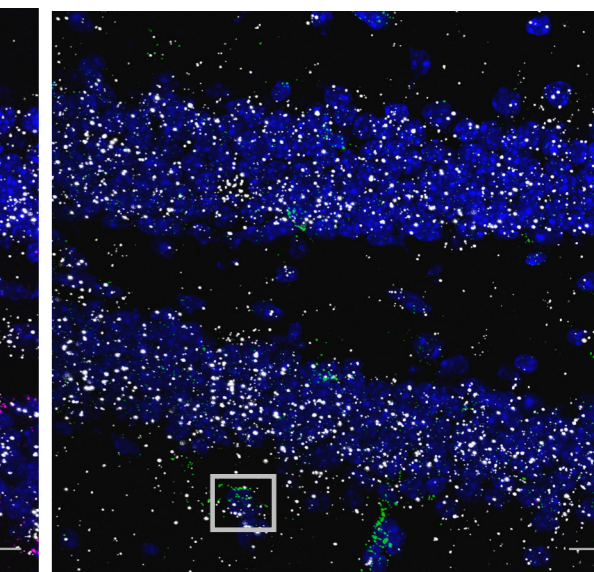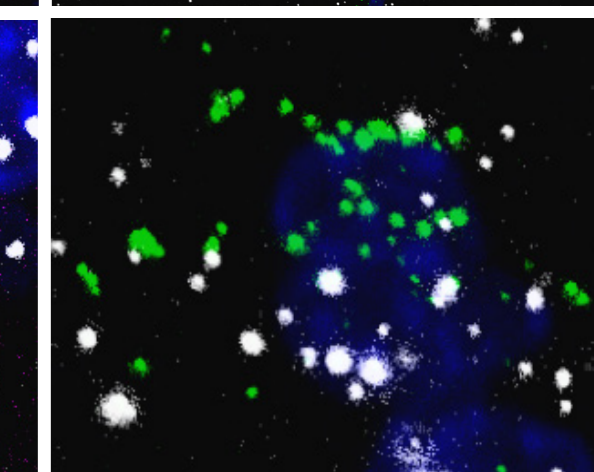



A)

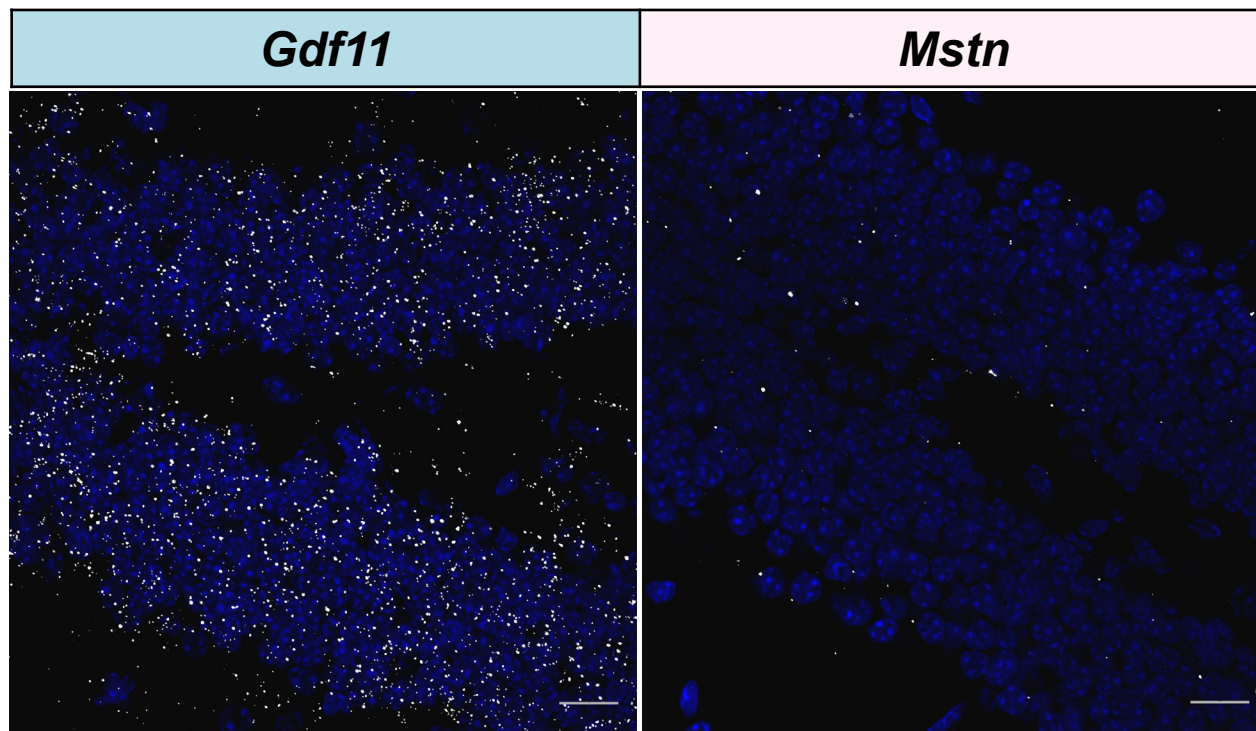

B)

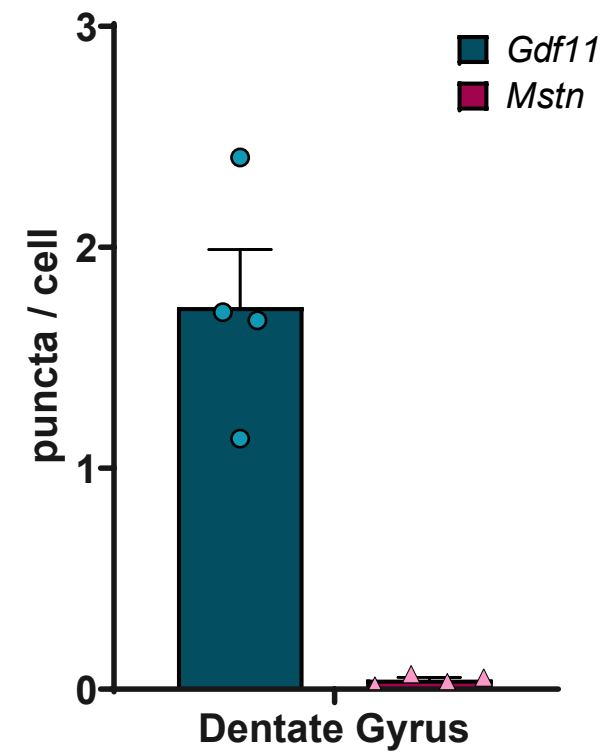

A)

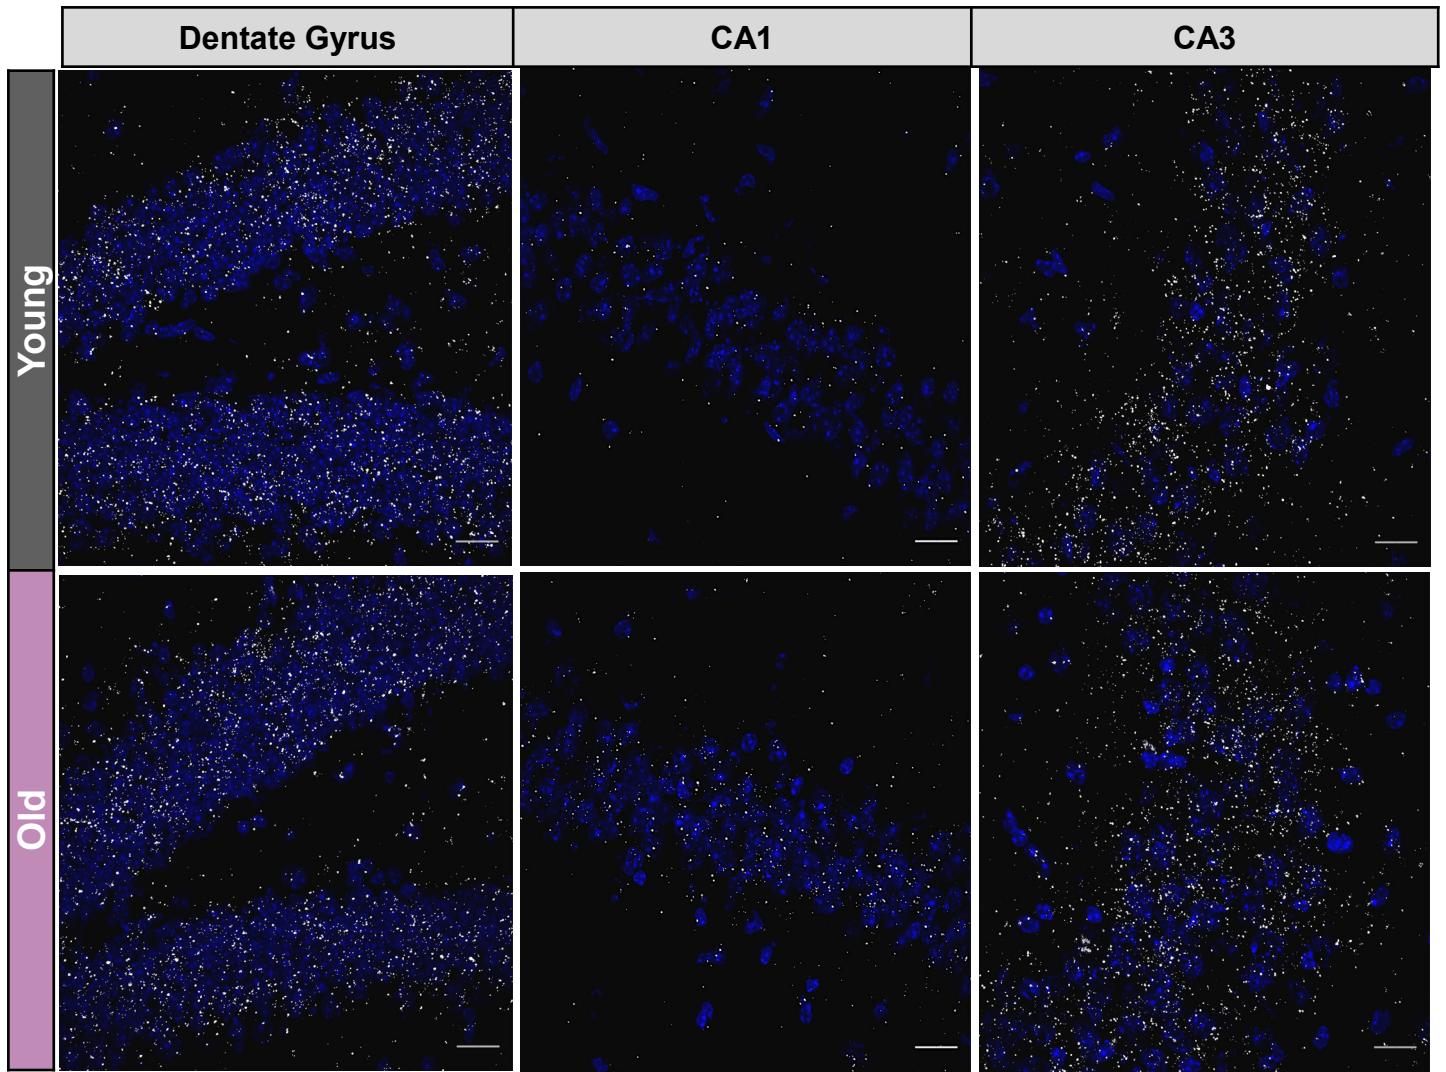

B)

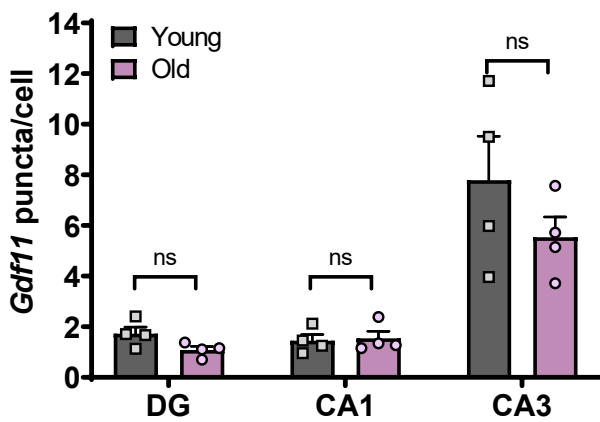

C)

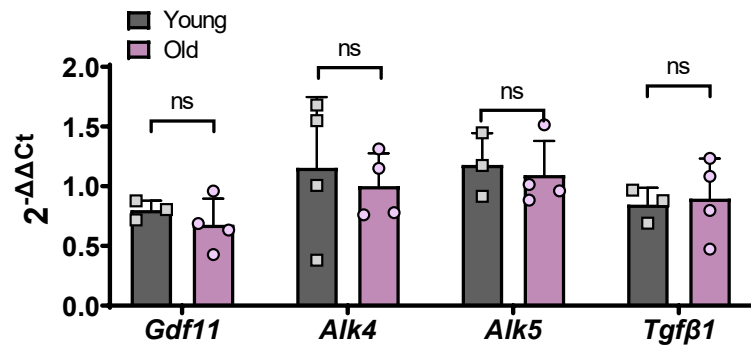

A)

## RNAscope

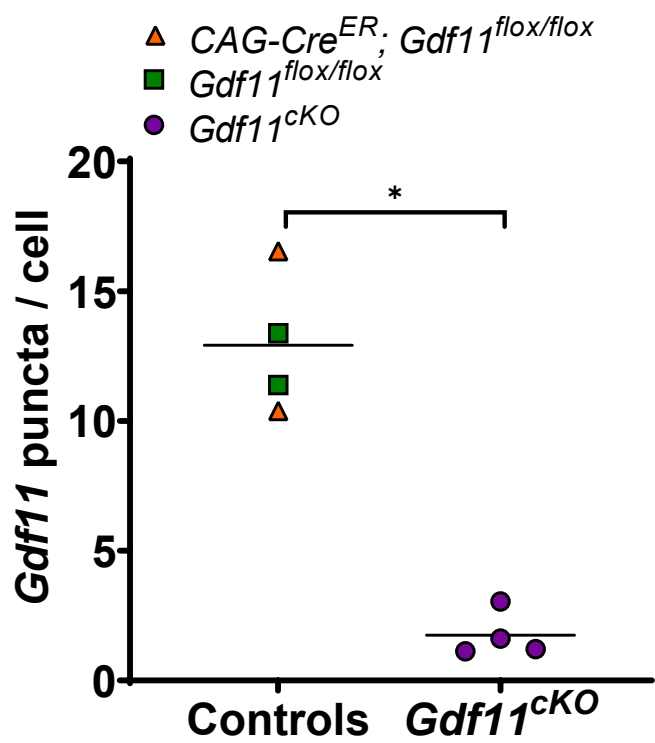

B)

## qPCR

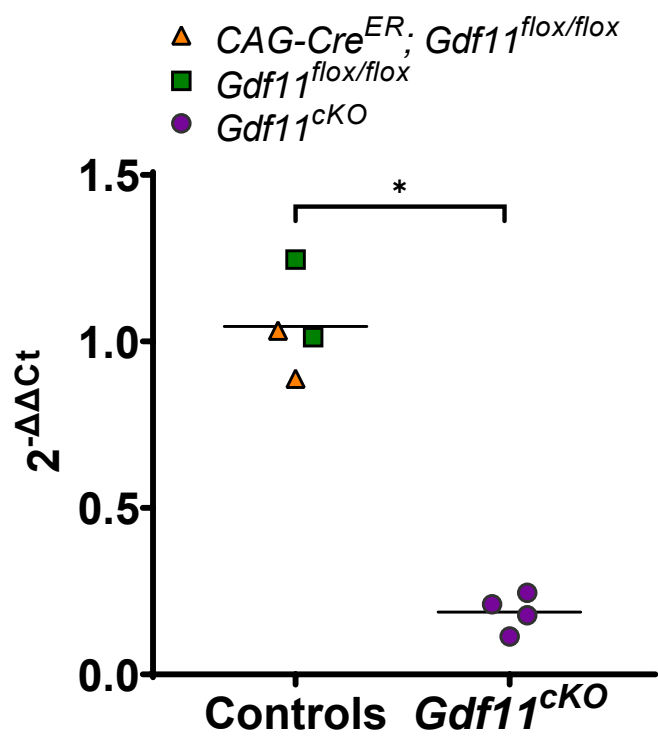

Supplement: 13041_2021_845_MOESM1_ESM.pdf [file 13041_2021_845_MOESM1_ESM.pdf]
